# Supplementary material for: The Artificial Intelligence (AI)-Based Chatbot for Promoting Physical Activity and Healthy Diet: Protocol for a Systematic Review
Source: Research Square preprint supplement (doi:10.21203/rs.3.rs-121903/v1), 2020-12-07
Supplement: Supplementary file 1 [file 0e740244d86fa4f37ab68281.docx]

### Sample search strategies for PubMed and EMBASE

**PubMed**

| # | Searches |
| --- | --- |
| 1 | ("Ai agent" OR “Ai agents” OR "Artificial agent" OR "Artificial agents" OR Artificial intelligence chatbot OR Artificial intelligence chatbots OR "Assistance technology" OR "Assistance technologies" OR “Chat bot”  OR “Chat bots” OR Chatbot OR Chatbots OR Chatterbot OR "Conversational agent" OR "Conversational agents" OR “Conversational AI” OR "Conversational assistant" OR "Conversational assistants" OR Conversational bot OR Conversational bots OR "Conversational interface" OR "Conversational interfaces" OR "Conversational system" OR "Conversational systems" OR "Dialog system" OR "Dialog systems" OR Dialogue agent OR "Dialogue system" OR "Dialogue systems"  OR "Digital assistant" OR "Digital assistants" OR Infobot OR "Intelligent agent" OR "Intelligent agents" OR Intelligent conversational assistant OR “Interactive agent” OR “Interactive agents” OR "Relational agent" OR "Relational agents" OR “Social robot” OR “Social robots” OR Virtual advisors OR "Virtual agent" OR "Virtual agents" OR “Virtual assistant” OR “Virtual assistants” OR “Virtual avatar” OR “Virtual avatars” OR “Virtual coach” OR “Virtual coaches” OR Virtual conversational agents) |
| 2 | (Diet [mh]] OR Diet OR Dietary OR Exercise [mh]] OR Exercise OR Lifestyle [mh]] OR Lifestyle OR Nutrition [mh] OR "Physical activity" OR “Physical activities” OR “Sedentary behavior”[mh]] OR “Sedentary behavior” OR “Sedentary time” OR “weight control” OR “Weight loss” [mh]] OR “Weight loss” OR “Weight losses” OR “Weight maintenance”) |
| 3 | #1 AND #2  Limited by English |

**EMBASE**

| # | Searches |
| --- | --- |
| 1 | 'ai agent' OR 'ai agents' OR 'artificial agent' OR 'artificial agents' OR 'artificial intelligence chatbot' OR 'artificial intelligence chatbots' OR 'assistance technology' OR 'assistance technologies' OR 'chat bot' OR 'chat bots' OR chatbot OR chatbots OR chatterbot OR 'conversational agent' OR 'conversational agents' OR 'conversational ai' OR 'conversational assistant' OR 'conversational assistants' OR 'conversational bot' OR 'conversational bots' OR 'conversational interface' OR 'conversational interfaces' OR 'conversational system' OR 'conversational systems' OR 'dialog system' OR 'dialog systems' OR 'dialogue agent' OR 'dialogue system' OR 'dialogue systems' OR 'digital assistant' OR 'digital assistants' OR infobot OR 'intelligent agent' OR 'intelligent agents' OR 'intelligent conversational assistant' OR 'interactive agent' OR 'interactive agents' OR 'relational agent' OR 'relational agents' OR 'social robot' OR 'social robots' OR 'virtual advisors' OR 'virtual agent' OR 'virtual agents' OR 'virtual assistant' OR 'virtual assistants' OR 'virtual avatar' OR 'virtual avatars' OR 'virtual coach' OR 'virtual coaches' OR 'virtual conversational agents' |
| 2 | 'body weight loss'/exp OR 'body weight loss' OR ‘diet’/exp OR ‘diet’ OR dietary OR ‘nutrition’/exp OR ‘nutrition’ OR ‘physical activity, capacity and performance’/exp OR ‘physical activity’/exp OR ‘physical activity’ OR ‘physical activities’ OR ‘exercise’/exp OR ‘exercise’ OR 'lifestyle'/exp OR 'lifestyle' OR 'lifestyle modification'/exp OR 'lifestyle modification' OR 'life style'/exp OR 'life style' OR lifestyle OR lifestyles OR 'sedentary time'/exp OR 'sedentary time' OR 'sedentary lifestyle'/exp OR 'sedentary lifestyle' OR 'sitting'/exp OR 'sitting' |
| 3 | #1 AND #2  Limited by English |
